# Supplementary material for: Relationship Between A1C and Fasting Plasma Glucose in Dysglycemia or Type 2 Diabetes
Source: Oxford University Press journal article supplement (doi:10.2337/dc11-1918), 2012-02-09

## SUPPLEMENTARY DATA

**Supplementary Figure 1.** Spline curves with 95% confidence intervals of the relationship between FPG and A1c are shown for people from different ethnicities on no OAD (panel 1) and on an OAD (panel 2)

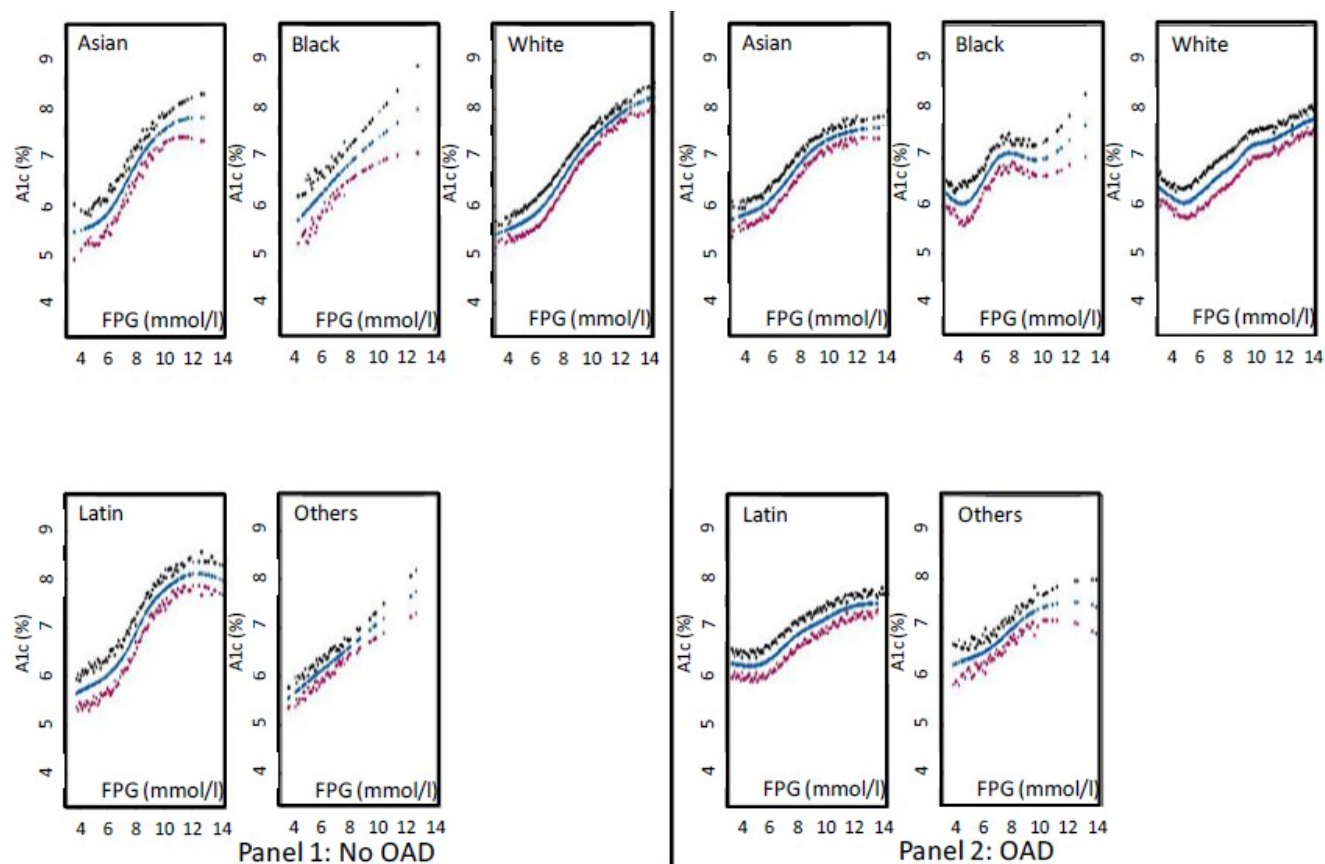

Supplement: dc111918supplementarydata.pdf [file dc111918supplementarydata.pdf]
